# Supplementary material for: An End-To-End Workflow for High-Throughput Discovery of Clinically Relevant Insights From Large Biomedical Datasets
Source: Research Square preprint supplement (doi:10.21203/rs.3.rs-113827/v1), 2020-12-07
Supplement: Supplementary file 1 [file 062ac34295044f50153fac78.xlsx]

## Sheet: Sheet1
An end-to-end workflow for high-throughput discovery of Clinically relevant insights from large biomedical datasets - Additional File 3
Age	Weight	Height	BMI	MetaP	Fat	BloodPreS	BloodPreD	Pulse	FatPerc	MusclePerc	WaistCircum	HipCircum	NeckCircum	FSG	Urea	UAC	Chol	TG	Crea	LDH	CBC	WBC	RBC	HB	Hct	MCV	MCH	MCHC	Platelet	Lymph	Mxd	Neut	RDW	PDW	MPV	T3	T4	TSH	LDL	Q1	Q2	Q3	Q4	Q5	Q6	Q7	Q8	Q9	Q10
55	114.7	163	43	1868	15	137	76	62	55	20	121	149	37	129	38	4.1	250	131	0.7	75		6300	4.85	13.80	41.30	85.20	28.50	33.40	268000	38.10	10.10	51.80	13.50	11.10	8.80					4	2	5	1		1	1	1	3	2
57	90.8	168	24.2	1842	18	138	88	72	32.9	30.2	47	117	42	102	34	7.3	306	123	1.0	46	241.1		6200	5.37	14.00	42.50	79.10	26.10	32.90	156000	38.40	12.40	49.20	13.90	12.30					4	1	5	1		2	1	1	3	3
43	90.7	178	28.6	1873	12	130	80	85	26.2	34.7	99	112	44	103	19	5.3	221	156	0.8	44		8400	5.37	16.90	47.40	88.30	31.80	36.10	257000	39.00	12.70	48.30	13.30	11.60	9.50					3	1	2	1		2	4	1	3	3
	59.8	151	26	1235	7	140	80	70	39.7	25.4	93	102	33	98	31	4.2	162	156	0.9	38		7800	4.43	14.70	40.80	92.10	33.20	36.00	252000	38.80	15.50	45.70	12.40	11.00	9.10					3	2	4	1		3	3	1	4	3
23	52	160	20	1217	3	100	70	89	30	26.5	84	95	32	90	34	2.2	185	87	0.7	63	108.6		6400	4.51	13.10	39.10	86.70	29.00	33.50	306000	32.50	8.60	58.90	11.50	10.30					1	2	2	1		5	5	2	2	2
28	50.7	161	23	1285	4	130	80	75	34.4	27.4	76	98	34	98 *	19 *	2.3 *	133 *	78 *	0.7 *	48 *	73.0		5600	4.66	13.90	41.00	88.00	29.80	33.90	205000	42.40	9.40	48.20	12.00	14.10					1	2	5	1		4	2	4	3	3
56	70	152	31	1343	11	130	90	78	46	22.8	100	110	39	108	37	4.1	213	171	1.0	373.8		4800	4.81	13.90	42.20	87.70	28.90	32.90	139000	41.80	7.50	50.70	12.10	16.20	11.30					4	2	5	1			2	1	3	4
39	60	155	25	1258	6	113	68	80	38.9	25.1	87	81	34	99 *	23 *	1.8 *	223 *	126 *	0.7 *	64 *	139.6		8200	4.68	13.00	38.20	81.60	27.80	34.00	359000	27.20	6.90	65.90	13.30	10.90					3	2	2	1		2	5	1	2	1
69	63	158	25	1454	12	160	90	72	24.7	32.6	86	99	45	103	30	4.3	154	127	1.1	327.6		7400	5.67	16.30	49.40	87.10	28.70	33.00	290000	39.10	10.20	50.70	13.10	11.70	9.30					5	1	5	1		2	2	1	5	4
	89	178	28	1846	11	140	90	67	23.4	35.8	102	106	41																											3	2	2	1		1	5	1	4	4
38	76	167	27.9	1714	11	120	70	50	27.6	34.9	97	105	37	86	42	4.0	241	123	0.9	46		6600	5.26	15.60	45.20	85.90	29.70	34.50	229000	35.90	11.20	52.90	13.10	11.70	9.40					2	1	3	1		3	3	1	3	2
	71	161	27	1402	8	130	90	75	44	23	85	108	36																											3	2	5	1		2	2	1	3	4
31	68.9	163	25.9	1389	5	110	70	65	37.7	27	72	103	33	90	20	3.3	150	72	0.7	42		5100	4.50	13.20	38.60	85.80	29.30	34.20	254000	36.30	10.00	53.70	12.50	12.20	9.80					2	2	3	1		3	3	1	2	2
42	92	158	36.9	1583	11	140	90	85	52.8	20.6	115	119	38	118	27	2.9	184	112	0.7	47		7800	4.92	13.30	40.30	81.90	27.00	33.00	265000	29.40	9.20	61.40	14.50	13.10	10.00					3	2	3	1		2	4	1
59	69.8	163	26.3	1583	11	135	80	57	17.7	38.5	99	104	38	108	36	4.3	174	88	0.8	66		5700	5.33	15.70	43.30	81.20	29.50	36.30	222000	38.10	9.60	52.30	12.80	12.30	9.10					4	1	5	1		2	4	1	3	3
	72	152	30.8	1362	10	110	80	90	47	22	95	114	34																											3	2	5	2	3	3	3	1	2	3
	83	146	39	1464	17	160	90	76	50	22	109	132	36																											5	1	5	2	3	2	2	1	5	4
55	61	166	22.2	1447	6	110	80	75	17	37	86	94	37	79	21	2.4	236	132	1.0	33	182.7		6000	5.37	14.10	43.80	81.60	26.30	32.20	234000	36.80	13.60	49.60	13.30	11.20					4	1	5	1		4	5	1	2	3
	68	167	24.5	1394	5	100	75	75	39	24	84	102	34																											1	2	2	1		4	4	2	2	2
	64.8	167	23.2	1363	4	116	60	72	35.8	26.6	91	100	34																											1	2	5	1		4	2	1	2	1
52	84.1	156	34.6	1531	11	137	87	87	45.3	24.6	108	113	37	107	22	4.5	205	123	0.9	56	130.1		7200	5.05	11.50	36.70	72.70	22.80	31.30	302000	37.70	10.70	51.60	15.70	11.00					4	2	5	1	2		1	1	3	3
	58.1	169	20	1313	3	100	62	63	30.7	27.5	71	97	32																											1	2	5	1		4	2	1	2	1
	59.8	151	26	1688	7	170	100	55	39.7	35.1	93	103	39	120	32	7.2	184	325	1.0	46		7500	5.44	16.10	46.70	85.80	29.60	34.50	264000	36.30	11.00	52.70	11.70	14.10	11.00					3	1	4	2	2	3	4	1	5	5
	65	152	28	1302	10	160	100	94	46	21	94	101	34	94	17	4.5	176	143	0.8	46		7600	5.40	15.70	46.00	85.20	29.10	34.10	297000	41.60	9.90	48.50	12.30	10.30	8.50					4	2	5	1		3	1	1	5	5
48	74	170	23.4	1665	6	140	100	80	17	39.8	92	98	39	99	29	2.8	187	77	0.8	51	124.2		6100	5.21	16.10	47.60	91.40	30.90	33.80	198000	39.70	9.10	51.20	12.40	13.50					3	1	5	2	2	5	2		4	5
51	86	158	34.4	1534	11	170	100	83	49	22	93	109	39	259	27	2.1	198	252	0.6	46		8700	5.21	14.80	43.30	83.10	28.40	34.20	240000	57.10	8.40	34.50	12.80	15.20	11.10					4	2	5	1		1	1	3	5	5
	65	171	22.4	1544	6	140	70	56	22.3	37	81	100	34																											2	1	2	1		4	3	1	4	2
	77	150	34.4	1413	14	130	80	80	48.9	22.3	115	106	39																											5	2	5	2	1	2	1	1	3	3
35	67.6	173	22.6	1589	6	130	86	83	18.3	39.8	87	95	37	114	30	4.0	253	114	0.9	52		5900	5.68	17.90	51.00	89.80	31.50	35.10	300000	37.40	7.00	55.60	12.20	9.90	8.10					2	1	1	1			3	1	3	3
	71	163	26.9	1621	12	160	100	101	26.9	34.7	91	104	37																											3	1	5	1		2	5	1	4	5
25	59.3	174	19.6	1490	2	110	68	62	12.5	43.4	78	90	38	90	20	3.5	113	89	0.8	35		7600	6.61	13.50	43.30	65.50	20.40	31.20	216000	32.40	10.00	57.60	17.10	11.90	9.40					1	1	5	1		3	2	1	2	1
64	86.9	145	41.3	1484	16	123	87	97	54	20.5	123	130	37	100	27	4.5	231	141	0.6	97		8300	5.31	15.70	47.40	89.30	29.60	33.10	232000	37.90	6.10	56.00	13.80	13.80	10.30					5	2	5	1		1	2	1
20	67	176	21.8	1615	5	120	100	110	19.2	40.4	65	101	38	102	21	3.6	184	53	0.8	45		8800	5.38	16.90	47.20	87.70	31.40	35.80	290000	35.80	13.60	50.60	12.60	12.00	9.10					1	1	5	1		3	1	1	3	3
37	75.4	170	29.5	1430	8	120	65	87	45.3	23.4	99	113	36	86	19	1.5	271	188	0.6	59		13800	4.23	12.70	36.50	86.30	30.00	34.80	273000	21.20	7.50	71.30	14.00	13.70	10.00					2	1	1	1		3	2	1	3	1
	74	160	28.9	1614	15	132	78	70	30.7	30.9	92	103	45																											5	1	5	1		4	2	1	3	2
	69	147	31.9	1302	9	110	70	65	46.8	23.2	96	102	36																											2	2	3	1		2	4	1	2	2
28	87	176	27.5	1869	9	120	80	64	26	36.3	99	108	43	96	20	5.4	186	105	0.9	43		6800	5.40	16.90	48.40	89.60	31.30	34.90	233000	42.70	10.60	46.70	12.70	11.80	9.40					1	1	5	1		2	3	2	3	3
	57	168	20.3	1474	3	120	80	89	13.3	43.5	80	89	38																											1	1	5	1		3	4	2	3	3
51	94	171	32	1907	17	160	100	85	29.5	32.5	112	106	44	135	27	2.8	291	290	0.9	45		8900	5.87	17.80	51.50	87.70	30.30	34.60	307000	31.10	10.00	58.90	12.80	12.60	9.80					4	1	5	1		3	2	1
54	78	165	29.9	1702	15	140	85	112	30.2	32.1	113	109	39	120	29	5.0	176	112	0.8	62		6000	4.58	14.60	44.70	97.60	31.90	32.70	139000	51.30	10.20	38.50	15.40	10.50	9.10					4	1	5	1		2	2	1
32	52	145	19.1	0	0	130	70	95	6	27	74	86	33	90	25.4	3.8	155	113	1.00	42		6700	5.22	15.90	47.80	91.60	30.50	33.30	222000	44.00	12.60	43.40	12.80	12.10	10.40					2	1	5	1		2	2	2	3	2
22	59	160	23.2	1547	6	130	90	97	15.9	44.4	80	93	39	101	29	4.8	173	85	1.1	65		7100	5.85	16.90	48.40	82.70	29.40	35.50	192000	36.50	8.70	54.80	13.00	12.90	9.70					1	1	5	1		4	2	2	3	4
	63	170	21.9	1416	7	115	68	64	20.9	33	98	96	38																											5	1	5	1		3	1	1
	69	167	24.9	1411	6	120	90	72	41.6	23.2	88	103	35																											2	2	4	1		3	2	1	3	4
63	68	152	29.7	1333	11	150	100	68	48.4	20.3	109	110	34	91	30	3.9	286	152	0.7	51		6800	4.77	14.90	44.00	92.20	31.40	34.10	326000	38.10	10.40	51.50	12.90	13.50	9.90					5	2	5	1		3	3	1
																																								5	1	5	1		3	4	1	3	2
	73	169	25.7	1657	9	120	80	85	28.5	34.5	54	103	38																											2	1	1	1		3	2	1	3	3
62	75	169	26.3	1614	12	160	90	84	26.2	36.7	56	96	41	89	26	4.2	329	756	1.0	47		7200	6.13	16.60	48.50	79.10	27.10	34.20	278000	49.00	13.00	38.00	13.80	14.60	10.20					5	1	5	1		1	4	1	5	4
	0	162	0	0	0	126	91	73	0	0	88	103	35																											2	2	5	2	1	3	4	2
	80	152	34.6	1449	14	140	70	70	49	22	113	131	37	116	40	6.2	124	127	0.8	58		5600	4.49	13.80	42.50	94.70	30.70	32.50	239000	35.70	10.50	53.80	12.60	13.00	10.10					5	2	5	1		1	1	3	4	2
	50	151	22	1142	5	126	74	73	31	29	76	92	31																											2	2	3	1		4	4	1	3	2
43	86	158	35	1525	10	130	87	78	51	21	101	115	37	90	27	4.4	227	180	0.9	51		10800	5.50	14.40	45.50	82.70	26.20	31.60	229000	28.20	8.60	63.20	14.90	14.20	10.60					3	2	3	1		4	3	1	3	3
50	61	144	29	1223	9	132	72	68	38	28	111	113	38	249	41	2.4	233	142	1.0	49		7600	5.29	16.80	47.80	90.40	31.80	35.10	246000	31.00	14.30	54.70	12.50	11.10	9.30					5	1	5	1		1	4	1	3	3
	74	160	28	1700	10	110	80	84	26	36	111	106	39																											3	1	3	1		3	4	1	2	3
35	72	162	27.5	1408	7	111	70	77	44	24	95	109	34	83	21	2.1	160	107	0.6	55		6500	4.54	14.00	41.30	91.00	30.80	33.90	270000	50.10	9.70	40.20	12.40	10.30	8.40					2	2	4	1		4	5	1	2	2
	68	173	23	1541	7	120	78	81	17	39	101	100	40																											2	1	2	1		4	4	1	3	2
	84	154	35	1500	15	140	90	86	52	21	108	116	38																												2	5	1		2	3	1	4	4
	53	168	19	1377	2	120	87	72	11	43	78	88	36																											3	1	2	1		3	1	0	3	3
42	64	170	22	1510	6	118	70	63	19	38	87	96	37	91	27	3.4	228	110	0.9	46		5700	5.29	15.40	44.20	83.60	29.10	34.80	199000	46.70	9.30	44.00	13.20	12.80	9.90					3	1	4	1		2	3	1	2	2
	77	189	21	1704	6	100	60	75	23	34	81	102	38	88	36	3.9	133	88	1.1	48		5900	5.27	15.70	48.20	91.50	29.80	32.60	176000	31.50	11.50	57.00	12.90	14.10	11.10					1	1	1	2	2	3	3	1	2	1
	68	172	23	1580	8	116	76	83	21	39	90	92	38	97	27	4.1	67	175	1.0	25		5600	5.94	12.90	41.70	70.20	21.70	30.90	190000	42.60	7.40	50.00	16.40	0.00	0.00					2	1	3	1		3	2	1	2	2
	56	146	26	1212	7	140	82	79	37	23	85	89	38																											5	2	5	1		1	1	3	4	3
	64	147	30	1263	12	130	87	67	48	21	104	103	35	83	63	9.2	204	120	1.3	61		10200	4.96	13.70	40.60	81.90	27.60	33.70	158000	23.80	8.70	67.50	13.30	13.40	9.90					5	2	5	1	1	2	1	1	3	3
	71	176	23	1626	6	120	60	78	23	36	97	103	37																											2	1	2	1		4	2	1	3	1
	77	190	21	1704	6	123	70	68	24	35	86	104	39																											1	1	2	1		4	1	1	3	2
	71	187	23	1626	6	110	70	76	23	36	97	103	37																											1	1	3	1		3	4	2	2	2
30	69	160	27	1364	6	122	73	67	41	25	92	99	38	88	17	6.1	203	465	0.8	35		7800	4.18	12.30	38.00	90.90	29.40	32.40	288000	39.10	8.50	52.40	12.00	12.60	9.50					2	2	5	1		4	3	2	3	2
	63	146	30	1262	10	150	97	73	45	22	103	101	38	101	37	5.1	176	235	1.0	55		8000	4.29	12.90	38.70	90.20	30.10	33.30	269000	33.20	8.70	58.10	12.30	11.60	9.10					5	2	5	1		1	1	1	4	4
	54	167	19	1378	2	130	85	70	11	42	78	89	37																											5	1	4	1		1	2	1	3	3
	75	155	21	1402	10	120	80	70	47	23	86	112	38																											3	1	2	2	2	2	2	1	3	3
	62	180	19	1534	1	120	80	58	8.4	50	76	92	36																											1	1	2	1		4	2	2	3	3
28	61	158	25	1287	5	105	60	75	26	38	84	100	34	84	24	4.6	144	89	0.9	51		6900	4.41	13.30	38.50	87.30	30.20	34.50	214000	39.10	11.80	49.10	12.80	11.90	9.70					2	2	2	1		4	1	1	2	1
57	53	166	19	1377	2	109	80	75	11	42	78	88	38	95	28	5.5	143	135	1.2	43		3700	5.04	14.60	42.60	84.50	29.00	34.30	165000	43.40	25.30	31.30	14.00	11.10	8.70						1	4	1		2	1	1	2	3
	74	161	29	1441	8	100	60	72	40	26	100	102	37	97	34	3.7	286	170	0.8	50		5900	4.60	12.90	39.10	85.00	28.00	33.00	227000	44.20	9.50	46.30	12.70	16.90	12.20					4	2	3	1		2	2	1	2	1
30	77	190	21.2	1704	6	110	70	68	22	36	87	108	39	96	23	8.2	213	322	1.1	38		6300	5.45	16.30	46.00	84.40	29.90	35.40	265000	40.40	7.40	52.20	13.80	13.40	10.10					1	1	2	1		4	1	1	3	2
70	57	150	26	1216	9	170	82	82	39	23	87	91	39	138	50	3.6	215	452	0.8	45		8100	4.43	13.30	39.00	88.00	30.00	34.10	315000	47.40	8.90	43.70	11.90	11.60	9.10					5	2	5	1	1	3	3	5	3	3
	63	146	29	1261	9	140	80	87	45	21	105	102	37																											5	1	5	1		1	1	1	4	3
	73	157	29	1402	10	110	70	89	44	24	101	107	34																											5	2	5	1		2	2	1	2	2
63	53	152	30	1350	8	122	90	79	19	38	75	92	35	97	39	3.9	158	135	1.1	37		4300	5.01	14.90	43.10	86.00	30.30	35.30	146000	33.80	12.80	53.40	12.50	11.70	9.80					5	1	5	1		2	2	1	2	2
	84	167	30	1569	8	121	82	75	43	26	91	106	37	90	21	4.3	174	126	0.7	47		5300	4.49	13.20	39.90	88.90	29.40	33.10	226000	37.20	13.10	49.70	13.20	14.50	10.70					1	2	2	1		4	1	1	2	2
	68	159	27	1552	13	120	81	98	25	34	111	107	43																											3	2	1			2	1	1	2	2
	42	149	19	1080	3	110	70	0	26	27	69	83	31																											1	2	2	1		4	3	1	2	2
																																									2	4	1		2	2	1	3	4
	53	169	19	1377	2	111	83	75	11	42	78	87	35																												1	4	1		2	2	1	2	3
	75	155	31	1402	10	120	80	70	28	41	97	101	35																											3	2	3	1		2	4	1	3	3
	76	162	29	1445	8	111	70	39	39	27	101	102	38	94	30	2.6	182	56	0.9	71		6000	4.48	11.90	37.50	83.70	26.60	31.70	143000	33.50	17.30	49.20	13.60	15.30	10.40						2	5	1	2	4	1	1	2	2
	64	170	22.3	1510	6	120	95	70	19	38	86	96	36	114	28	5.2	174	89	1.0	41		7000	5.47	15.80	49.10	89.80	28.90	32.20	217000	38.10	10.10	51.80	13.20	12.00	9.30					4	1	4	1		3	4	1
	84	167	30	1569	8	130	90	79	43	26	90	105	36																											2	2	2	1		3	2	1	3	4
	74	161	29	1441	8	100	63	75	40	26	100	102	37																											3	2	3	1		2	3	1	2	1
63	97	152	42	1594	15	160	89	78	59	17	135	118	42	111	39	6.6	219	163	0.9	64		6600	4.96	14.90	43.90	88.50	30.40	34.40	244000	45.80	6.20	48.00	12.90	12.30	10.50					5	2	5	1		1	2	1	5	3
	84	167	30	1569	8	122	90	79	43	26	92	106	37																											3	2	3	1		3	2	1	3	4
	53	152	23	1348	8	110	70	63	19	38	76	93	34	125	31	4.9	184	181	1.0	52		4600	4.57	14.30	44.30	96.90	31.30	32.30	141000	40.80	6.20	53.00	12.30	12.00	9.50					4	1	4	1		2	2	1	2	2
	54	168	19.3	1378	2	103	76	75	11.5	43	77	87	38																											2	1	3	1		2	3	1	2	2
	89	165	33	1906	14	120	90	82	32	34	100	104	43																											2	1	2	1		2	3	1	2	4
55	76	157	31	1427	11	110	70	65	49	21	96	100	37	150	25	4.4	246	422	0.7	64		5000	4.51	14.00	38.10	84.50	31.00	36.70	178000	38.70	11.60	49.70	12.10	13.40	9.50					3	2	3	1		2	4	1	2	2
20	58	167	23	1141	6	119	80	85	35	27	85	99	35	95	25	2.2	138	55	0.8	57		5500	4.98	14.40	43.60	87.60	28.90	33.00	223000	41.70	10.60	47.70	13.10	12.60	10.10						2	2	1		3	2	1	2	3
	63	159	28	1300	6	111	75	69	42	22	89	100	37																											1	2	2	1		3	2	1	2	2
45	84	167	30	1560	8	110	73	69	43	26	100	102	36	91	29	4.7	155	107	0.8	46		6500	5.06	12.10	40.30	79.60	23.90	30.00	281000	26.90	9.80	63.30	24.60	15.40	10.10					3	2	3	1		2	2	1	2	2
83	88	169	32	1907	14	120	78	69	32	34	100	105	44	103	32	6.9	199	251	1.3	47		5500	5.34	16.20	46.10	86.30	30.30	35.10	214000	39.00	12.20	48.80	13.10	12.90	10.10					5	1	5	1		2	3	1	3	2
34	54	168	19	1382	4	120	80	77	10	42	76	83	37	97	38	6.2	178	244	0.9	38		5400	5.44	15.60	45.30	83.30	28.70	34.40	200000	38.80	9.20	52.00	13.40	14.40	10.40					2	1	3	1		3	3	1	3	3
[truncated: 287 more columns]
