# Supplementary material for: An End-To-End Workflow for High-Throughput Discovery of Clinically Relevant Insights From Large Biomedical Datasets
Source: Research Square preprint supplement (doi:10.21203/rs.3.rs-113827/v1), 2020-12-07
Supplement: Supplementary file 1 [file 47122f5415bb4485e9bd165e.pdf]

# An end-to-end workflow for high-throughput discovery of clinically relevant insights from large biomedical datasets -

## Additional File 2

**Table S1.** All communities identified by the Minimal Forest and a short description of their variables.

| Community | Q    | Description                               | Q     | Description                  | Q        | Description                       |
|-----------|------|-------------------------------------------|-------|------------------------------|----------|-----------------------------------|
| 1         | HB   | Blood Hemoglobin                          | MPV   | Mean Platelet Volume         | Platelet | Blood Platelet Count              |
|           | Hct  | Hematocrit                                | Mxd   | Blood mixed lymphocyte count | RBC      | Blood Red Blood Cell Count        |
|           | MCH  | Mean Corpuscular Hemoglobin               | Lymph | Blood Lymphocyte Count       | RDW      | Red Blood Cell Distribution Width |
|           | MCHC | Mean Corpuscular Hemoglobin Concentration | Neut  | Blood Neutrophil Count       | WBC      | Blood White Blood Cell Count      |
|           | MCV  | Mean Corpuscular Volume                   | PDW   | Platelet Distribution Width  |          |                                   |
| 2         | 180  | Freq of brushing teeth                    | 183   |                              | 186      | Dental health                     |
|           | 181  | Freq of dental floss                      | 184   |                              |          |                                   |
|           | 182  | do you have full dentures                 | 185   |                              |          |                                   |
| 3         | BMI  | Body-Mass Index                           | 6     | Education                    | 241      | Time spent on chat apps           |
|           | Fat  | Body Fat                                  | 11    |                              | 253      | Smoker?                           |

|   |            |                                      |     |                                       |             |                                                         |
|---|------------|--------------------------------------|-----|---------------------------------------|-------------|---------------------------------------------------------|
|   | HipCircum  | Hip Circumference                    | 225 | Number of glasses of water per day    | WaistCircum | Waist Circumference                                     |
|   | MetaP      | Resting Metabolic Rate               | 230 | which supplements in the past month?  | Weight      |                                                         |
|   | NeckCircum | Neck Circumference                   | 233 | Use of module spoon to add salt       |             |                                                         |
|   | 2          | Gender                               | 240 | Time spent on internet                |             |                                                         |
| 4 | 34         | Notice mouth is dry                  | 42  | Feel don't have sth to be waiting for | 51          | Notice unusual heart activity without physical activity |
|   | 35         | Think you can't feel good experience | 43  | Feel distressed                       | 52          | Fear with no reason                                     |
|   | 36         | Have trouble breathing               | 45  | Feeling heart dead and heart broken   | 53          | Feel life is meaningless                                |
|   | 37         | Difficult to volunteer for work      | 47  | Fear at any moment                    | 98          | Asthma                                                  |
|   | 39         | Feel tremor in body                  | 48  | Not able to show enthusiasm           | 101         | FH of asthma                                            |
|   | 41         | Worried about panic or stupidity     | 49  | Not feeling valuable                  |             |                                                         |
| 5 | 33         | Difficulty in staying calm           | 40  | Feel use of a lot of mental energy    | 46          | Can't keep patience                                     |
|   | 38         | Wild reactions to situations         | 44  | Calmness is difficult                 | 50          | Very irritable and sensitive                            |

|   |         |                                              |     |                                           |     |                                        |
|---|---------|----------------------------------------------|-----|-------------------------------------------|-----|----------------------------------------|
| 6 | Chol    | Blood cholesterol                            | HDL | Blood high-density lipoproteins           | UAC | Blood uric acid concentration          |
|   | Crea    | Blood creatinine                             | LDL | Blood low-density lipoproteins            |     |                                        |
|   | FatPerc | Body fat percentage                          | TG  | Blood triglycerides                       |     |                                        |
| 7 | 20      | Sleep duration throughout a day              | 26  | Have nightmares                           | 196 | Fastening Seatbelt                     |
|   | 21      | Time to falling asleep                       | 32  | Number of close friends                   | 212 | Method of cooking fish                 |
|   | 22      | Consumption of painkillers and tranquilizers | 54  | Self-assessment of health                 | 213 | Candy consumption                      |
|   | 23      | Freq of not falling asleep in 30 minutes     | 58  | Self-assessment of energy levels          | 217 | Type of cooking                        |
|   | 24      | Wake up at night to go to toilet             | 107 | Depression                                | 221 |                                        |
|   | 25      | Wake up at night or early morning            | 110 | Family history of depression              | 222 | Fruit consumption                      |
|   | 229     | Type of dairy product                        | 232 | Put salt on the table                     |     |                                        |
| 8 | 12      | Freq of vigorous Physical activity           | 29  | Time spent with family and friends        | 224 | Removal of chicken skin before cooking |
|   | 14      | Freq of moderate PA                          | 30  | Time spoke to family and friends on phone | 226 | Number of glasses of milk per week     |
|   | 16      | Freq of low PA                               | 207 | Freq of eating breakfast                  | 227 | Number of cups of yogurt per week      |

|    |     |                                                         |     |                                         |     |                                 |
|----|-----|---------------------------------------------------------|-----|-----------------------------------------|-----|---------------------------------|
| 9  | 17  | Duration of low PA sessions                             | 223 | Removal of fat from meat before cooking | 228 | Number of cheese meals per week |
|    | 27  | How many hours of TV                                    | 203 | Hamburgers, hot dogs                    | 211 | Freq of beans                   |
|    | 28  | How many hours of movies and satellite                  | 204 | French fries, samosa, falafel           | 216 | Dental health                   |
|    | 197 | What do you drink with food                             | 205 | Olivier salad                           | 218 | Freq of muffins and cakes       |
|    | 198 | Freq of carbonated drinks                               | 206 | Canned food                             | 219 | Freq of snacks                  |
|    | 199 | Freq of sweetened drinks                                | 208 | Freq of eggs                            | 220 | Freq of vegetables              |
|    | 201 | Main reason for buying fast food                        | 209 | Freq of meat                            |     |                                 |
|    | 202 | Amount spent on fast food                               | 210 | Freq of chicken                         |     |                                 |
| 10 | 55  | Limitation in physical activity due to physical problem | 78  | Nocturnal snoring problem               | 174 |                                 |
|    | 56  | Limitation in work due to physical problem              | 166 |                                         | 177 |                                 |
|    | 57  | Amount of body pain in last month                       | 170 | PMH past month neck pain                | 178 |                                 |
|    | 59  | Restriction of social relationships by mental and       | 171 | PMH past month back pain                | 179 |                                 |

|    |            |                                                                 |     |                                   |     |                                                      |
|----|------------|-----------------------------------------------------------------|-----|-----------------------------------|-----|------------------------------------------------------|
| 11 |            | physical problems                                               |     |                                   |     |                                                      |
|    | 60         | Amount of hurt by mental problems                               | 172 | PMH past month knee pain          |     |                                                      |
|    | 61         | Restriction of daily activities by physical and mental problems | 173 | PMH of gout                       |     |                                                      |
|    | FSG        | Fasting Serum Glucose                                           | 70  | FH of heart disease               | 125 | FH of arthritis                                      |
|    | Height     | Height                                                          | 79  | FH of sudden death                | 158 | Bladder surgery                                      |
|    | MusclePerc | Muscle Percentage                                               | 80  | Diabetes                          | 214 | Freq of middle-sized sugar cubes                     |
|    | Pulse      | Pulse rate                                                      | 88  | FH of diabetes                    | 215 | Freq of fried food in week                           |
|    | 1          | Age                                                             | 89  | Blood cholesterol increased       | 234 | Employment                                           |
|    | 3          | Duration of current residence                                   | 92  | FH of increased blood cholesterol | 237 | Type of medical insurance                            |
|    | 4          | Native of Yazd                                                  | 93  | Blood coagulation problems        | 238 | Hours sitting at work                                |
|    | 7          | Number of household members                                     | 97  | FH of blood coagulation problems  | 239 | Hours sitting at work or public or private transport |
|    | 8          | Marital status                                                  | 115 | Osteoporosis                      | 242 | Referral to traditional practitioner                 |
|    | 18         | Time of going to bed                                            | 120 | FH of osteoporosis                |     |                                                      |

|    |           |                            |     |                    |     |                      |
|----|-----------|----------------------------|-----|--------------------|-----|----------------------|
|    | 19        | Time of waking up          | 121 | Arthritis          |     |                      |
| 12 | BloodPreD | Diastolic blood pressure   | 10  |                    | 160 | Kidney stone surgery |
|    | BloodPreS | Systolic blood pressure    | 62  | Heart disease?     | 168 | Open heart surgery   |
|    | 9         |                            | 71  | HTN?               | 126 | Skin cancer          |
| 13 | 102       | Thyroid problems           | 137 | FH of lung cancer  | 145 | FH of stomach cancer |
|    | 106       | FH of thyroid problems     | 141 | FH of colon cancer |     |                      |
| 14 | 75        | History of mental illness? | 114 | FH of Alzheimer's  | 149 |                      |
|    | 111       | Alzheimer's disease?       | 142 | Stomach cancer     |     |                      |

**Table S2.** Predictors for osteoporosis identified by the EN algorithm

| Predictor   | Description                  | The observed correlation | Previous mentions in medical literature |
|-------------|------------------------------|--------------------------|-----------------------------------------|
| HB          | (Blood Hemoglobin)           | Negative                 |                                         |
| RBC         | (Blood Red Blood Cell Count) | Negative                 |                                         |
| WaistCircum | Waist Circumference          | Positive                 |                                         |
| MusclePerc  | (Muscle Percentage)          | Negative                 |                                         |
| FatPerc     | (Fat Percentage)             | Positive                 |                                         |
| BloodPreS   | Systolic Blood Pressure      | Positive                 |                                         |
| MetaP       | Resting Metabolic Rate       | Negative                 |                                         |
| Height      | Height                       | Negative                 |                                         |

**Table S3.** Predictors for resting metabolic rate as identified by the Elastic Net algorithm.

| Predictor         | Description                                        | The observed pattern | Previous mentions in medical literature |
|-------------------|----------------------------------------------------|----------------------|-----------------------------------------|
| <b>MusclePerc</b> | Muscle Percentage                                  | Positive             |                                         |
| <b>RBC</b>        | Blood Red Blood Cell Count                         | Positive             |                                         |
| <b>BMI</b>        | Body Mass Index                                    | Positive             |                                         |
| <b>HB</b>         | Blood Hemoglobin                                   | Positive             |                                         |
| <b>UAC</b>        | Blood Uric Acid Concentration                      | Positive             |                                         |
| <b>Fat</b>        | Body Fat                                           | Positive             |                                         |
| <b>NeckCircum</b> | Neck Circumference                                 | Positive             |                                         |
| <b>Height</b>     | Nocturnal snoring problems<br>- Pain in knee joint | Positive             |                                         |
| <b>Weight</b>     | Frequency of sleeping pills -<br>Candy consumption | Positive             |                                         |
